# Supplementary material for: Rutin alleviates dietary advanced glycation end products (AGEs)-induced insulin resistance in mice by modulation of gut microbiota
Source: Royal Society of Chemistry journal article supplement (doi:10.1039/d5fo04604a), 2026-01-01
Supplement: d5fo04604a1.pdf [file d5fo04604a1.pdf]

**Supporting Information For:**

**Rutin alleviates dietary advanced glycation end products (AGEs)-induced insulin resistance in mice by modulation of gut microbiota**

Yi Lu<sup>1,#</sup>, Lijun Chang<sup>2,#</sup>, Shuangbo Liu<sup>1</sup>, Mingfu Wang<sup>3</sup>, Yueliang Zhao<sup>2,\*</sup>

<sup>1</sup> College of Food Science and Technology, Shanghai Ocean University, Shanghai, 201306, China

<sup>2</sup> School of Public Health, Shanghai Jiao Tong University School of Medicine, Shanghai, 200025, China

<sup>3</sup> Shenzhen Key Laboratory of Food Nutrition and Health, College of Chemistry and Environmental Engineering, Shenzhen University, Shenzhen, 518060, PR China

# Yi Lu and Lijun Chang contributed equally to this work.

\* To whom correspondence should be addressed:

Prof. Yueliang Zhao, School of Public Health, Shanghai Jiao Tong University School of Medicine, Email: ylzhaol@sjtu.edu.cn

Table S1 Indicators of NAFLD activity score (NAS).

| Histologic feature    | Category                 | Score           |
|-----------------------|--------------------------|-----------------|
| Steatosis, %          | < 5                      | 0               |
|                       | 5-33                     | 1               |
|                       | 34-66                    | 2               |
|                       | > 66                     | 3               |
| Lobular inflammation  | None                     | 0               |
|                       | < 2 foci per 200 × field | 1               |
|                       | 2-4 foci per 200 × field | 2               |
|                       | > 4 foci per 200 × field | 3               |
| Hepatocyte ballooning | None                     | 0               |
|                       | Few balloon cells        | 1               |
|                       | Many balloon cells       | 2               |
| Total score           |                          | NAS score (0-8) |

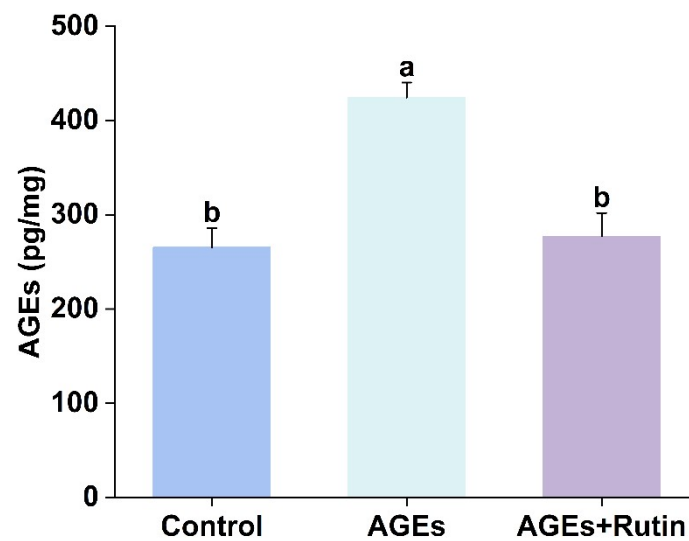

Figure S1 AGEs contents in mouse liver. Control: Mice were fed a standard AIN-93G diet. AGEs: Mice were fed a high-AGEs diet (60.38 mg/kg body weight/day). AGEs + Rutin: Mice were fed a high-AGEs diet (60.38 mg/kg body weight/day) + rutin (100 mg/kg body weight/day). Values are mean ± SD. Different superscript letters (a–b) indicate significant differences among groups ( $P < 0.05$ ).

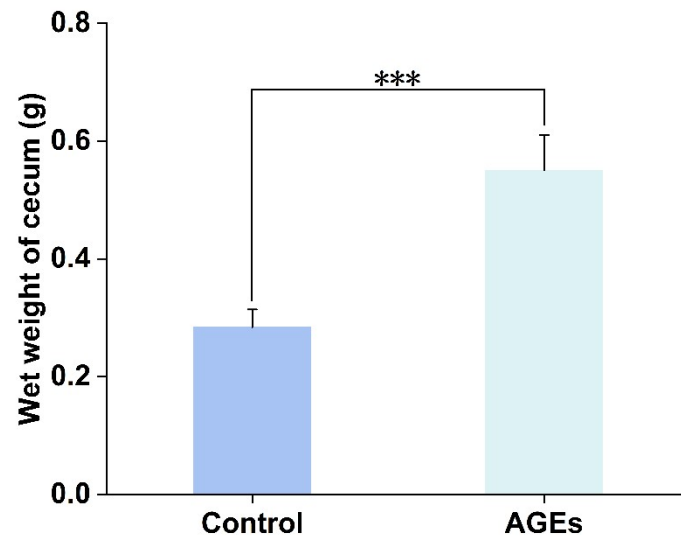

Figure S2 The effect of dietary AGEs on cecal wet weight in mice. Control: Mice were fed a standard AIN-93G diet. AGEs: Mice were fed a high-AGEs diet (60.38 mg/kg body weight/day). Data are expressed as mean  $\pm$  SD (n = 10). \*\*\* $P < 0.001$ .
